# Supplementary figures and images for: The Heterogeneity of Infiltrating Macrophages in Metastatic Osteosarcoma and Its Correlation with Immunotherapy
Source: Hindawi journal article supplement (doi:10.1155/2021/4836292), 2021-07-21

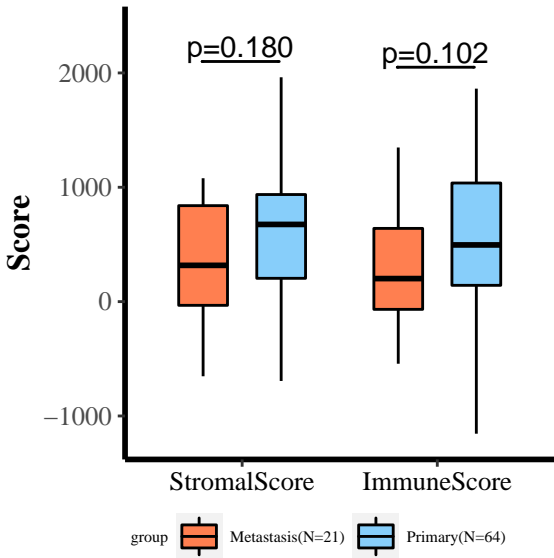

Supplement: f1 [file 4836292.f1.zip]

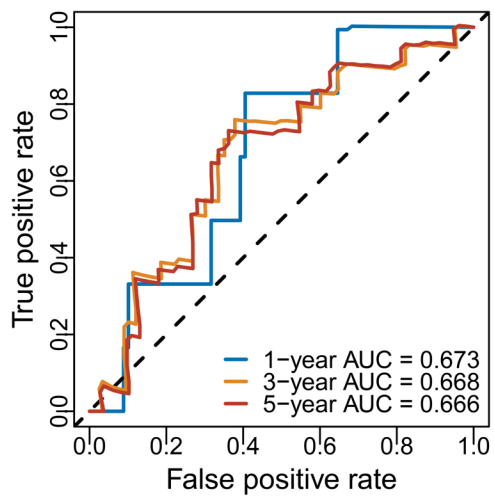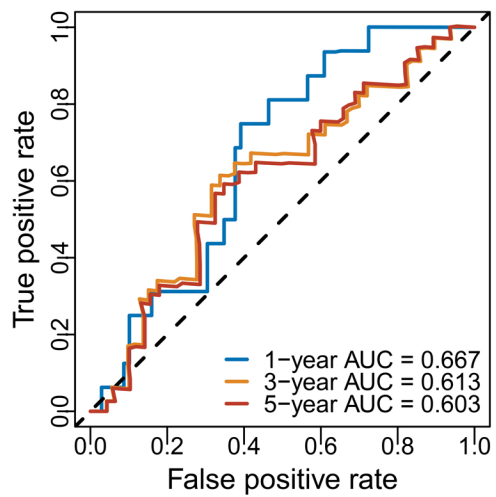

Supplement: f1 [file 4836292.f1.zip]

Macrophages

Wilcoxon,  $p = 0.45$

0.15

0.10

0.05

0.00

Lung only(N=16)

Bone and lung(N=5)

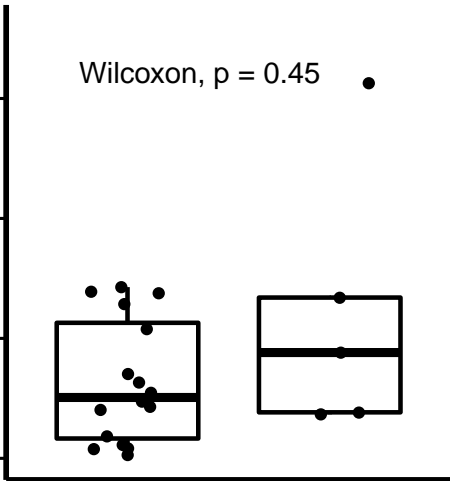

Supplement: f1 [file 4836292.f1.zip]

# Sample clustering to detect outliers

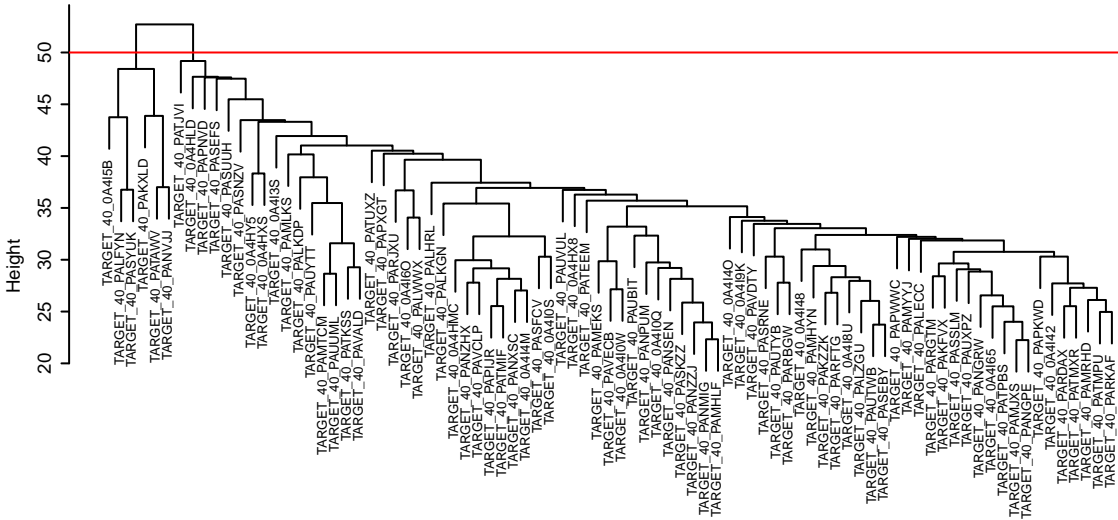

Supplement: f1 [file 4836292.f1.zip]
